# Supplementary material for: Translation error clusters induced by aminoglycoside antibiotics
Source: PubMed Central journal article supplement (PMC7987974; doi:10.1038/s41467-021-21942-6), 2021-03-23
Supplement: 41467_2021_21942_MOESM2_ESM.pdf [file 41467_2021_21942_MOESM2_ESM.pdf]

## Reporting Summary

Nature Research wishes to improve the reproducibility of the work that we publish. This form provides structure for consistency and transparency in reporting. For further information on Nature Research policies, see our [Editorial Policies](#) and the [Editorial Policy Checklist](#).

### Statistics

For all statistical analyses, confirm that the following items are present in the figure legend, table legend, main text, or Methods section.

n/a Confirmed

- |                                     |                                     |                                                                                                                                                                                                                                                            |
|-------------------------------------|-------------------------------------|------------------------------------------------------------------------------------------------------------------------------------------------------------------------------------------------------------------------------------------------------------|
| <input type="checkbox"/>            | <input checked="" type="checkbox"/> | The exact sample size ( $n$ ) for each experimental group/condition, given as a discrete number and unit of measurement                                                                                                                                    |
| <input type="checkbox"/>            | <input checked="" type="checkbox"/> | A statement on whether measurements were taken from distinct samples or whether the same sample was measured repeatedly                                                                                                                                    |
| <input type="checkbox"/>            | <input checked="" type="checkbox"/> | The statistical test(s) used AND whether they are one- or two-sided<br><i>Only common tests should be described solely by name; describe more complex techniques in the Methods section.</i>                                                               |
| <input checked="" type="checkbox"/> | <input type="checkbox"/>            | A description of all covariates tested                                                                                                                                                                                                                     |
| <input type="checkbox"/>            | <input checked="" type="checkbox"/> | A description of any assumptions or corrections, such as tests of normality and adjustment for multiple comparisons                                                                                                                                        |
| <input type="checkbox"/>            | <input checked="" type="checkbox"/> | A full description of the statistical parameters including central tendency (e.g. means) or other basic estimates (e.g. regression coefficient) AND variation (e.g. standard deviation) or associated estimates of uncertainty (e.g. confidence intervals) |
| <input type="checkbox"/>            | <input checked="" type="checkbox"/> | For null hypothesis testing, the test statistic (e.g. $F$ , $t$ , $r$ ) with confidence intervals, effect sizes, degrees of freedom and $P$ value noted<br><i>Give <math>P</math> values as exact values whenever suitable.</i>                            |
| <input checked="" type="checkbox"/> | <input type="checkbox"/>            | For Bayesian analysis, information on the choice of priors and Markov chain Monte Carlo settings                                                                                                                                                           |
| <input type="checkbox"/>            | <input checked="" type="checkbox"/> | For hierarchical and complex designs, identification of the appropriate level for tests and full reporting of outcomes                                                                                                                                     |
| <input type="checkbox"/>            | <input checked="" type="checkbox"/> | Estimates of effect sizes (e.g. Cohen's $d$ , Pearson's $r$ ), indicating how they were calculated                                                                                                                                                         |

*Our web collection on [statistics for biologists](#) contains articles on many of the points above.*

### Software and code

Policy information about [availability of computer code](#)

|                 |                                                                                                                                                                                                                                                                                                                                                                                                                                                                |
|-----------------|----------------------------------------------------------------------------------------------------------------------------------------------------------------------------------------------------------------------------------------------------------------------------------------------------------------------------------------------------------------------------------------------------------------------------------------------------------------|
| Data collection | The commercial software of Thermo Fisher mass spectrometers was used for data acquisition (see Source data file). Fluorescent peptides were detected using Starion IR/FLA-9000 scanner (FujiFilm).                                                                                                                                                                                                                                                             |
| Data analysis   | DDA data was analyzed in MaxQuant (version 1.5.5.1, 1.6.0.1, 1.6.5.0) or PEAKS (version 10.5). Proteomics results were analyzed in Perseus (version 1.6.5.0) or Skyline (4.2.0.19009, 20.1.1.158 and 3.5). Targeted data was analyzed in Skyline. Multigauge software of the Fujifilm FLA-9000 fluorescence scanner was used to quantify the translation time courses. Data were visualized in GraphPadPrism (version 8.3) and CorelDRAW (version 18.1.0.661). |

For manuscripts utilizing custom algorithms or software that are central to the research but not yet described in published literature, software must be made available to editors and reviewers. We strongly encourage code deposition in a community repository (e.g. GitHub). See the Nature Research [guidelines for submitting code & software](#) for further information.

### Data

Policy information about [availability of data](#)

All manuscripts must include a [data availability statement](#). This statement should provide the following information, where applicable:

- Accession codes, unique identifiers, or web links for publicly available datasets
- A list of figures that have associated raw data
- A description of any restrictions on data availability

A detailed report on the data structure and availability is provided in the Source data file.

MS data are deposited to the ProteomeXchange Consortium. All DDA data were deposited via PRIDE partner repository:

1. All DDA data for EF-Tu:

Project Name: Translation Error Clusters Induced by Aminoglycoside Antibiotics

Website: <https://www.ebi.ac.uk/pride/>  
 ProteomeXchange ID: PXD019188

2. Additional data on the identification of error clusters in other proteins:  
 Project Name: Translation Error Clusters Induced by Aminoglycoside Antibiotics  
 ProteomeXchange ID: PXD022098

We deposited analysis steps of the DDA data and targeted MS data via the PanoramaPublic partner repository.  
 Access URL (<https://panoramaweb.org/Error-cluster.url>)  
 Reserved ProteomeXchange ID: PXD019328

These data provide evidence to substantiate all conclusions. The residual raw data can be provided upon reasonable request.

## Field-specific reporting

Please select the one below that is the best fit for your research. If you are not sure, read the appropriate sections before making your selection.

Life sciences       Behavioural & social sciences       Ecological, evolutionary & environmental sciences

For a reference copy of the document with all sections, see [nature.com/documents/nr-reporting-summary-flat.pdf](https://nature.com/documents/nr-reporting-summary-flat.pdf)

## Life sciences study design

All studies must disclose on these points even when the disclosure is negative.

|                 |                                                                                                                                                                                                                                                                                                                                                                                |
|-----------------|--------------------------------------------------------------------------------------------------------------------------------------------------------------------------------------------------------------------------------------------------------------------------------------------------------------------------------------------------------------------------------|
| Sample size     | We report the existence of AGA-induced error clusters and validated 96 clusters in 9 proteins of E. coli. As we report a qualitatively new phenomenon, a sample size calculation was not necessary.                                                                                                                                                                            |
| Data exclusions | In general, no data was excluded. Especially for the characterization of error clusters all analyzed examples are reported. In Figures 4b,d,5a,7a samples from low AGA concentrations for which no error clusters were detectable by PRM were excluded from linear fitting.                                                                                                    |
| Replication     | Experiments that led to quantitative conclusions were repeated (as indicated in figure legends). Biological replicates include individual cell growth, drug treatment, sample processing, data acquisition and analysis. Technical replicates are based on repeatedly analyzed samples. All findings could be reproduced and no replicate led to deviating conclusions.        |
| Randomization   | Sample randomization is not necessary (see also Blinding). Because aminoglycosides increase the frequency of errors over orders of magnitude, blinding and randomization would hinder an efficient control of chromatographic carry over.                                                                                                                                      |
| Blinding        | Samples were not blinded. As we use the misreading inducing property of aminoglycosides as intensity-based filter in our analysis, blinding is not compatible with our experimental setup. Our exploratory study reveals qualitatively new phenomena, thus an expectancy or confirmation bias is excluded. All conclusions are validated by different experimental approaches. |

## Reporting for specific materials, systems and methods

We require information from authors about some types of materials, experimental systems and methods used in many studies. Here, indicate whether each material, system or method listed is relevant to your study. If you are not sure if a list item applies to your research, read the appropriate section before selecting a response.

### Materials & experimental systems

| n/a                                 | Involvement in the study                               |
|-------------------------------------|--------------------------------------------------------|
| <input checked="" type="checkbox"/> | <input type="checkbox"/> Antibodies                    |
| <input checked="" type="checkbox"/> | <input type="checkbox"/> Eukaryotic cell lines         |
| <input checked="" type="checkbox"/> | <input type="checkbox"/> Palaeontology and archaeology |
| <input checked="" type="checkbox"/> | <input type="checkbox"/> Animals and other organisms   |
| <input checked="" type="checkbox"/> | <input type="checkbox"/> Human research participants   |
| <input checked="" type="checkbox"/> | <input type="checkbox"/> Clinical data                 |
| <input checked="" type="checkbox"/> | <input type="checkbox"/> Dual use research of concern  |

### Methods

| n/a                                 | Involvement in the study                        |
|-------------------------------------|-------------------------------------------------|
| <input checked="" type="checkbox"/> | <input type="checkbox"/> ChIP-seq               |
| <input checked="" type="checkbox"/> | <input type="checkbox"/> Flow cytometry         |
| <input checked="" type="checkbox"/> | <input type="checkbox"/> MRI-based neuroimaging |
